# Supplementary material
Source: PubMed Central journal article supplement (PMC3491912)
Supplement: NIHMS404700-supplement-appendix.pdf [file NIHMS404700-supplement-appendix.pdf]

## Appendix

Throughout the appendix, we assume that  $h = h(n)$  is a sequence such that as  $n \rightarrow \infty$ ,  $h \rightarrow 0$ , and  $nh \rightarrow \infty$ . We also assume that  $z$  is an interior point of the support of  $Z$ . We assume the following regularity conditions:

- i)  $\theta(\cdot)$  and  $f_Z(\cdot)$  satisfy the smoothness assumptions of Fan, et. al. (1995);
- ii) The estimating functions in the right hand side of naive kernel estimating equations, IPW kernel estimating equations, and AIPW kernel estimating equations are twice continuously differentiable with respect to  $\alpha$  at a target point  $z$ , and the second derivatives are uniformly bounded.

### A.1 Sketch of the Proof of Theorem 1

If  $\mu^{(1)}\{\tilde{\theta}_{naive}(z)\} \neq 0$ , simple calculations show that the solution of equation (7) for  $\tilde{\theta}_{naive}(z)$  is  $\mu\{\tilde{\theta}_{naive}(z)\} = E(RY|Z=z)/E(R|Z=z)$ , which is equal to  $cov(R, Y|Z=z)/E(R|Z=z) + \mu\{\theta(z)\}$ . This gives the expression for  $\tilde{\theta}_{naive}(z)$  stated in the theorem.

Next study the expression of  $\tilde{\theta}_{IPW}(z)$ . The left hand side of (8) is equal to

$$E \left[ \frac{E(R|Y, Z, \mathbf{U})}{\tilde{\pi}} \mu^{(1)}\{\tilde{\theta}_{IPW}(z)\} V^{-1}\{\tilde{\theta}_{IPW}(z); \tilde{\zeta}\} \left[ Y - \mu\{\tilde{\theta}_{IPW}(z)\} \right] \middle| Z = z \right]$$

by taking a double expectation given  $Y$ ,  $Z$  and  $\mathbf{U}$ . If model (3) of  $\pi$  is correctly specified, then  $\tilde{\pi} = E(R|Z, \mathbf{U})$ . Also under MAR,  $E(R|Y, Z, \mathbf{U}) = E(R|Z, \mathbf{U})$ . Therefore the above quantity equals to  $E[\mu^{(1)}\{\tilde{\theta}_{IPW}(z)\} \times V^{-1}\{\tilde{\theta}_{IPW}(z); \tilde{\zeta}\} [Y - \mu\{\tilde{\theta}_{IPW}(z)\}] | Z = z]$ . If  $\mu^{(1)}\{\tilde{\theta}_{IPW}(z)\} \neq 0$ , solving for  $\tilde{\theta}_{IPW}(z)$  yields  $\mu\{\tilde{\theta}_{IPW}(z)\} = E[Y|Z=z] = \mu\{\theta(z)\}$ . Therefore,  $\tilde{\theta}_{IPW}(z)$  is a consistent estimator of  $\theta(z)$  when model (3) of  $\pi$  is correctly specified or  $\pi_0$  is known by design.

Now study the expression of  $\tilde{\theta}_{AIPW}(z)$  from (9). Under the MAR assumption (2), the left hand side of (9) can be rewritten as

$$\begin{aligned} & E \left[ \mu^{(1)}\{\tilde{\theta}_{AIPW}(z)\} V^{-1}\{\tilde{\theta}_{AIPW}(z); \tilde{\zeta}\} \left[ Y - \mu\{\tilde{\theta}_{AIPW}(z)\} \right] | Z = z \right] \\ + & E \left[ \left( \frac{R}{\tilde{\pi}} - 1 \right) \mu^{(1)}\{\tilde{\theta}_{AIPW}(z)\} V^{-1}\{\tilde{\theta}_{AIPW}(z); \tilde{\zeta}\} \left[ Y - \tilde{\delta}(Z, \mathbf{U}) \right] | Z = z \right] = 0. \quad (\text{A.1}) \end{aligned}$$

If model (3) for  $\pi$  is correctly specified, i.e.,  $\tilde{\pi} = E(R|Z, \mathbf{U})$ , or model (6) for  $\delta(\cdot)$  is correctly specified, i.e.,  $\tilde{\delta}(Z, \mathbf{U}) = E(Y|Z, \mathbf{U})$ , one can easily see that the second term of (A.1) is 0. Hence (A.1) is equal to

$$E \left[ \mu^{(1)}\{\tilde{\theta}_{AIPW}(z)\} V^{-1}\{\tilde{\theta}_{AIPW}(z); \tilde{\zeta}\} \left[ Y - \mu\{\tilde{\theta}_{AIPW}(z)\} \right] | Z = z \right] = 0.$$

It follows that if  $\mu^{(1)}\{\tilde{\theta}_{AIPW}(z)\} \neq 0$ , we have  $\tilde{\theta}_{AIPW}(z) = \theta(z)$ , i.e.,  $\tilde{\theta}_{AIPW}(z)$  is a consistent estimator of  $\theta(z)$ .

## A.2 Proof of Theorem 2: Asymptotic Bias and Variance of the IPW Estimator

We first assume that  $\pi_0$  is known by design and prove that the asymptotic distribution of  $\hat{\theta}_{IPW}(z)$  is given in (10). We also assume that the variance parameter  $\zeta$  in the working variance  $V$  is known. We will then extend the results when  $\pi$  and  $\zeta$  are estimated. For any interior point  $z$ , reparameterize  $\alpha$  as  $\{\theta(z), h\theta'(z)\}^T$  and denote by  $\theta_0(z)$  the true value of  $\theta(z)$ ,  $\alpha_0 = \{\theta_0(z), h\theta'_0(z)\}^T$  and  $\hat{\alpha}_{IPW}(z)$  the solution of the local linear IPW kernel estimating equations. A Taylor expansion of the local linear IPW kernel estimating equations gives

$$\sqrt{nh}\{\alpha_{IPW}(z) - \alpha_0\} = -\sqrt{nh}\{\Gamma_n(\alpha_*)\}^{-1}\Lambda_n(\alpha_0),$$

where  $\alpha_*$  is between  $\hat{\alpha}_{IPW}(z)$  and  $\alpha_0$ , and

$$\Lambda_n(\alpha) = n^{-1} \sum_{i=1}^n R_i \pi_{i0}^{-1}(Z_i, \mathbf{U}_i) K_h(Z_i - z) \mu_i^{(1)}(z, \alpha) V_i^{-1}(z, \alpha) \mathbf{G}(Z_i - z) [Y_i - \mu\{\mathbf{G}(Z_i - z)^T \alpha\}],$$

where  $\mu_i^{(1)}(z, \alpha) = \mu^{(1)}\{\mathbf{G}(Z_i - z)^T \alpha\}$  and  $V_i(z, \alpha) = V[\mu\{\mathbf{G}(Z_i - z)^T \alpha\}; \zeta_0]$ ,  $\Gamma_n(\alpha) = \partial \Lambda_n(\alpha) / \partial \alpha^T$ .

Using the results in Appendix A.1, we have  $\hat{\alpha}_{IPW}(z) \rightarrow \alpha_0$  in probability. Therefore,  $\alpha_* \xrightarrow{P} \alpha_0$ . Under the MAR assumption (2), simple calculations show that

$$\begin{aligned} \Gamma_n(\alpha_*) &= -E \left[ K_h(Z - z) \left\{ \mu^{(1)}(z, \alpha_0) \right\}^2 V^{-1}(z, \alpha_0) \mathbf{G}(Z - z) \mathbf{G}(Z - z)^T \right] + o_p(1) \\ &= -f_Z(z) \left( \mu^{(1)}\{\theta(z)\} \right)^2 V^{-1}\{\theta(z)\} \mathbf{D}(K) + o_p(1) \end{aligned}$$

where  $\mathbf{D}(K)$  is a  $2 \times 2$  matrix with the  $(j, k)$ th element  $c_{j+k-2}(K) \times h^{(j+k-2)}$ , and  $c_r(K) = \int s^r K(s) ds$ . It follows that

$$\sqrt{nh}\{\hat{\alpha}_{IPW}(z) - \alpha_0\} = \left\{ f_Z(z) \left[ \mu^{(1)}\{\theta(z)\} \right]^2 V^{-1}\{\theta(z)\} \mathbf{D}(K) \right\}^{-1} \sqrt{nh} \Lambda_n(\alpha_0) + o_p(1). \quad (\text{A.2})$$

Now write  $\Lambda_n(\alpha_0) = \Lambda_{1n}(\alpha_0) + \Lambda_{2n}(\alpha_0)$ , where

$$\begin{aligned} \Lambda_{1n}(\alpha_0) &= n^{-1} \sum_{i=1}^n R_i \pi_{i0}^{-1}(Z_i, \mathbf{U}_i) K_h(Z_i - z) \mu_i^{(1)}(z, \alpha_0) V_i^{-1}(z, \alpha_0) \mathbf{G}(Z_i - z) [Y_i - \mu\{\theta(Z_i)\}] \\ \Lambda_{2n}(\alpha_0) &= n^{-1} \sum_{i=1}^n R_i \pi_{i0}^{-1}(Z_i, \mathbf{U}_i) K_h(Z_i - z) \mu_i^{(1)}(z, \alpha_0) V_i^{-1}(z, \alpha_0) \mathbf{G}(Z_i - z) [\mu\{\theta(Z_i)\} - \mu\{\mathbf{G}(Z_i - z)^T \alpha_0\}]. \end{aligned}$$

One can easily show that  $\Lambda_{1n}(\alpha_0)$  is asymptotically normal with mean zero and asymptotic variance

$$\begin{aligned} \text{var}\{\Lambda_{1n}(\alpha_0)\} &= \frac{1}{n} E \left[ K_h^2(Z - z) \left\{ \mu^{(1)}(z, \alpha_0) \right\}^2 V^{-2}(z, \alpha_0) \left( \frac{R[Y - \mu\{\theta(Z)\}]}{\pi_0(Z, \mathbf{U})} \right)^2 \mathbf{G}(Z - z) \mathbf{G}(Z - z)^T \right] \\ &= \frac{1}{nh} f_Z(z) \left( \mu^{(1)}\{\theta(z)\} \right)^2 V^{-2}\{\theta(z)\} E \left[ \left( \frac{R[Y - \mu\{\theta(Z)\}]}{\pi_0(Z, \mathbf{U})} \right)^2 \middle| Z = z \right] \mathbf{D}(K^2) + o\left(\frac{1}{nh}\right), \end{aligned}$$

where  $\mathbf{D}(K^2)$  is defined similarly to  $\mathbf{D}(K)$  with  $K$  replaced by  $K^2$ .

Now study  $\mathbf{\Lambda}_{2n}$ , which contributes to the leading bias term. One can easily show under MAR, we have

$$\begin{aligned} bias\{\mathbf{\Lambda}_{2n}(\boldsymbol{\alpha}_0)\} &= E\left\{K_h(Z-z)\mu^{(1)}(z, \boldsymbol{\alpha}_0)V^{-1}(z, \boldsymbol{\alpha}_0)\left[\mu\{\theta(Z)\}-\mu\{\mathbf{G}(Z-z)^T\boldsymbol{\alpha}_0\}\right]\mathbf{G}(Z-z)\right\}+o_p(1) \\ &= \frac{1}{2}\theta''(z)\left[\mu^{(1)}\{\theta(z)\}\right]^2V^{-1}\{\theta(z)\}f_Z(z)\mathbf{H}(K)+o(h^2), \end{aligned} \quad (\text{A.3})$$

where  $\mathbf{H}(K)$  is a  $2 \times 1$  vector with the  $k$ th element  $c_{k+1}(K) \times h^{(k+1)}$ . Note that the asymptotic variance of  $\mathbf{\Lambda}_{2n}$  is of order  $o(1/nh)$  and is asymptotically negligible compared to  $\mathbf{\Lambda}_{1n}$ , and the asymptotic covariance of  $\mathbf{\Lambda}_{1n}$  and  $\mathbf{\Lambda}_{2n}$  is  $\mathbf{0}$ . Applying these results to (A.2), simple calculations show that the asymptotic distribution of the IPW estimator  $\hat{\theta}_{IPW}(z; \pi)$ , the first element of  $\hat{\boldsymbol{\alpha}}_{IPW}$ , is given in (10).

We next study the distribution of  $\hat{\theta}_{IPW}\{z; \pi(\hat{\boldsymbol{\tau}})\}$  when  $\pi_0$  is estimated consistently at the  $\sqrt{n}$ -rate, i.e.  $\sqrt{n}(\hat{\boldsymbol{\tau}} - \boldsymbol{\tau}_0) = O_p(1)$ , where  $\boldsymbol{\tau}_0$  is the true value of  $\boldsymbol{\tau}$ . Suppose under some regularity conditions,  $\partial\hat{\theta}_{IPW}\{z; \pi(\boldsymbol{\tau})\}/\partial\boldsymbol{\tau}^T$  is bounded in the neighborhood of the  $\boldsymbol{\tau}_0$ , i.e.,

$$\partial\hat{\theta}_{IPW}\{z; \pi(\boldsymbol{\tau})\}/\partial\boldsymbol{\tau}^T|_{\boldsymbol{\tau} \in \mathcal{N}(\boldsymbol{\tau}_0)} = O_p(1),$$

where  $\mathcal{N}(\boldsymbol{\tau}_0) \supset \{\boldsymbol{\tau} : \|\boldsymbol{\tau} - \boldsymbol{\tau}_0\| < \|\hat{\boldsymbol{\tau}} - \boldsymbol{\tau}_0\|\}$ . We have

$$\begin{aligned} &\sqrt{nh}[\hat{\theta}_{IPW}\{z; \pi(\hat{\boldsymbol{\tau}})\} - \theta(z)] \\ &= \sqrt{nh}[\hat{\theta}_{IPW}\{z; \pi(\hat{\boldsymbol{\tau}})\} - \hat{\theta}_{IPW}\{z; \pi(\boldsymbol{\tau}_0)\}] + \sqrt{nh}[\hat{\theta}_{IPW}\{z; \pi(\boldsymbol{\tau}_0)\} - \theta(z)] \\ &= \sqrt{h}\left[\frac{\partial\hat{\theta}_{IPW}\{z; \pi(\boldsymbol{\tau})\}}{\partial\boldsymbol{\tau}^T}\Big|_{\boldsymbol{\tau}^*}\right]\sqrt{n}(\hat{\boldsymbol{\tau}} - \boldsymbol{\tau}_0) + \sqrt{nh}[\hat{\theta}_{IPW}\{z; \pi(\boldsymbol{\tau}_0)\} - \theta(z)] \end{aligned} \quad (\text{A.4})$$

for some  $\boldsymbol{\tau}^* \in \{\boldsymbol{\tau} : \|\boldsymbol{\tau} - \boldsymbol{\tau}_0\| < \|\hat{\boldsymbol{\tau}} - \boldsymbol{\tau}_0\|\}$ . Note  $\sqrt{n}(\hat{\boldsymbol{\tau}} - \boldsymbol{\tau}_0) = O_p(1)$ ,  $\partial\hat{\theta}_{IPW}\{z; \pi(\boldsymbol{\tau})\}/\partial\boldsymbol{\tau}^T|_{\boldsymbol{\tau}^*} = O_p(1)$ , and  $h \rightarrow 0$  as  $n \rightarrow \infty$ , the first term in (A.4) is  $o_p(1)$ . Therefore, the asymptotic distribution of  $\hat{\theta}_{IPW}\{z; \pi(\hat{\boldsymbol{\tau}})\}$  when  $\boldsymbol{\tau}$  is estimated consistently at  $\sqrt{n}$ -rate is the same as that of  $\hat{\theta}_{IPW}(z; \pi_0)$  when  $\pi_0$  is known. Similar argument shows that the asymptotic distribution of  $\hat{\theta}_{IPW}\{z\}$  remains the same if  $\boldsymbol{\zeta}$  is estimated at the  $\sqrt{n}$ -rate.

### A.3 Proof of Theorem 3: Asymptotic Bias and Asymptotic Variance of AIPW estimator

Following similar arguments as those in Appendix A.2, the asymptotic results hold when the parameters  $(\boldsymbol{\tau}, \boldsymbol{\eta})$  in  $\pi$  and  $\delta$  are estimated at the  $\sqrt{n}$ -rate, or the probability limit of  $(\hat{\boldsymbol{\tau}}, \hat{\boldsymbol{\eta}})$  is used in the AIPW kernel estimating equations (4). Denote by  $(\tilde{\boldsymbol{\tau}}, \tilde{\boldsymbol{\eta}})$  the probability limit of  $(\hat{\boldsymbol{\tau}}, \hat{\boldsymbol{\eta}})$ , and let  $\tilde{\pi}(Z_i, \mathbf{U}_i) = \pi(Z_i, \mathbf{U}_i; \tilde{\boldsymbol{\tau}})$ ,  $\tilde{\delta}(Z_i, \mathbf{U}_i) = \delta(Z_i, \mathbf{U}_i; \tilde{\boldsymbol{\eta}})$ . We focus our proof on assuming that  $(\tilde{\boldsymbol{\tau}}, \tilde{\boldsymbol{\eta}})$  are known. By a linear Taylor expansion of the AIPW estimating function (4) about  $\boldsymbol{\alpha}_0$ , the AIPW kernel estimator satisfies

$$\sqrt{nh}\{\hat{\boldsymbol{\alpha}}_{AIPW}(z) - \boldsymbol{\alpha}_0\} = -\sqrt{nh}\{\mathbf{\Gamma}_{n,\delta}(\boldsymbol{\alpha}_*)\}^{-1}\mathbf{\Lambda}_{n,\delta}(\boldsymbol{\alpha}_0),$$

where  $\boldsymbol{\alpha}_*$  is between  $\hat{\boldsymbol{\alpha}}_{AIPW}(z)$  and  $\boldsymbol{\alpha}_0$ ,

$$\begin{aligned} \boldsymbol{\Lambda}_{n,\delta}(\boldsymbol{\alpha}) &= n^{-1} \sum_{i=1}^n \left\{ R_i \tilde{\pi}^{-1}(Z_i, \mathbf{U}_i) K_h(Z_i - z) \mu_i^{(1)}(z, \boldsymbol{\alpha}) V_i^{-1}(z, \boldsymbol{\alpha}) \mathbf{G}(Z_i - z) [Y_i - \mu \{ \mathbf{G}(Z_i - z)^T \boldsymbol{\alpha} \}] \right. \\ &\quad \left. - \{ R_i \tilde{\pi}^{-1}(Z_i, \mathbf{U}_i) - 1 \} K_h(Z_i - z) \mu_i^{(1)}(z, \boldsymbol{\alpha}) V_i^{-1}(z, \boldsymbol{\alpha}) \mathbf{G}(Z_i - z) [\tilde{\delta}(Z_i, \mathbf{U}_i) - \mu \{ \mathbf{G}(Z_i - z)^T \boldsymbol{\alpha} \}] \right\}, \end{aligned}$$

and  $\boldsymbol{\Gamma}_{n,\delta}(\boldsymbol{\alpha}) = \partial \boldsymbol{\Lambda}_{n,\delta}(\boldsymbol{\alpha}) / \partial \boldsymbol{\alpha}^T$ .

We consider the following two situations:

(1) When model (3) for the selection probability  $\pi_{i0}$  is correctly specified, i.e.  $\tilde{\pi}(Z_i, \mathbf{U}_i) = \pi_{i0}(Z_i, \mathbf{U}_i)$ ;

(2) When model (6) for  $E(Y|Z, \mathbf{U})$  is correctly specified, i.e.  $\tilde{\delta}(Z_i, \mathbf{U}_i) = E(Y_i|Z_i, \mathbf{U}_i)$ .

As shown in Appendix A.1,  $\hat{\boldsymbol{\alpha}}_{AIPW}(z)$  converges to  $\boldsymbol{\alpha}_0$  when either of the above conditions holds. Therefore,  $\boldsymbol{\alpha}_* \xrightarrow{P} \boldsymbol{\alpha}_0$ . We first show that under either of the above situations, we have

$$\boldsymbol{\Gamma}_{n,\delta}(\boldsymbol{\alpha}_*) \xrightarrow{P} -f_Z(z) \left[ \mu^{(1)}\{\theta(z)\} \right]^2 V^{-1}\{\theta(z)\} \mathbf{D}(K). \quad (\text{A.5})$$

First consider situation (1), i.e., when  $\tilde{\pi}(Z_i, \mathbf{U}_i) = \pi_{i0}(Z_i, \mathbf{U}_i)$ . The second term of  $\boldsymbol{\Lambda}_{n,\delta}(\boldsymbol{\alpha})$ , i.e. the augmentation term, has mean 0 under MAR. It follows that  $\boldsymbol{\Lambda}_{n,\delta}(\boldsymbol{\alpha}_*) = \boldsymbol{\Lambda}_n(\boldsymbol{\alpha}_0) + \mathbf{o}_p(1)$ , where  $\boldsymbol{\Lambda}_n$  is defined in Appendix A.2. Hence  $\boldsymbol{\Gamma}_{n,\delta}(\boldsymbol{\alpha}_*) = \boldsymbol{\Gamma}_n(\boldsymbol{\alpha}_0) + \mathbf{o}_p(1)$ . Therefore  $\boldsymbol{\Gamma}_{n,\delta}(\boldsymbol{\alpha}_*)$  has the same probability limit as  $\boldsymbol{\Gamma}_n(\boldsymbol{\alpha}_*)$ . As shown in Appendix A.2, the probability of limit of  $\boldsymbol{\Gamma}_n(\boldsymbol{\alpha}_*)$  is exactly the right hand side of (A.5), and thus (A.5) holds for  $\boldsymbol{\Gamma}_{n,\delta}(\boldsymbol{\alpha}_*)$  as well.

Next consider situation (2), i.e., when  $\tilde{\delta}(Z_i, \mathbf{U}_i) = E(Y_i|Z_i, \mathbf{U}_i)$ . Rewrite  $\boldsymbol{\Lambda}_{n,\delta}(\boldsymbol{\alpha})$  as

$$\begin{aligned} \boldsymbol{\Lambda}_{n,\delta}(\boldsymbol{\alpha}) &= n^{-1} \sum_{i=1}^n \left\{ R_i \tilde{\pi}^{-1}(Z_i, \mathbf{U}_i) K_h(Z_i - z) \mu_i^{(1)}(z, \boldsymbol{\alpha}) V_i^{-1}(z, \boldsymbol{\alpha}) \mathbf{G}(Z_i - z) [Y_i - \tilde{\delta}(Z_i, \mathbf{U}_i)] \right. \\ &\quad \left. + K_h(Z_i - z) \mu_i^{(1)}(z, \boldsymbol{\alpha}) V_i^{-1}(z, \boldsymbol{\alpha}) \mathbf{G}(Z_i - z) [\tilde{\delta}(Z_i, \mathbf{U}_i) - \mu \{ \mathbf{G}(Z_i - z)^T \boldsymbol{\alpha} \}] \right\}. \end{aligned}$$

One can easily see the first term on the right hand side has mean 0. It follows that

$$\boldsymbol{\Lambda}_{n,\delta}(\boldsymbol{\alpha}_*) = n^{-1} \sum_{i=1}^n K_h(Z_i - z) \mu_i^{(1)}(z, \boldsymbol{\alpha}_0) V_i^{-1}(z, \boldsymbol{\alpha}_0) \mathbf{G}(Z_i - z) [E(Y_i|Z_i, \mathbf{U}_i) - \mu \{ \mathbf{G}(Z_i - z)^T \boldsymbol{\alpha}_0 \}] + \mathbf{o}_p(1).$$

Differentiating it with respect to  $\boldsymbol{\alpha}$  shows that  $\boldsymbol{\Gamma}_{n,\delta}(\boldsymbol{\alpha}_*) = \boldsymbol{\Gamma}_n(\boldsymbol{\alpha}_0) + \mathbf{o}_p(1)$ . Therefore, (A.5) still holds in this situation.

Therefore, when either the  $\pi$  or  $\delta$  model is correctly specified, we have

$$\sqrt{n\bar{h}} \{ \hat{\boldsymbol{\alpha}}_{AIPW}(z) - \boldsymbol{\alpha}_0 \} = \left\{ f_Z(z) \left[ \mu^{(1)}\{\theta(z)\} \right]^2 V^{-1}\{\theta(z)\} \mathbf{D}(K) \right\}^{-1} \sqrt{n\bar{h}} \boldsymbol{\Lambda}_{n,\delta}(\boldsymbol{\alpha}_0) + \mathbf{o}_p(1). \quad (\text{A.6})$$

Write  $\boldsymbol{\Lambda}_{n,\delta}(\boldsymbol{\alpha}_0) = \boldsymbol{\Lambda}_{1n,\delta}(\boldsymbol{\alpha}_0) - \boldsymbol{\Lambda}_{2n,\delta}(\boldsymbol{\alpha}_0) + \boldsymbol{\Lambda}_{3n,\delta}(\boldsymbol{\alpha}_0)$ , where

$$\boldsymbol{\Lambda}_{1n,\delta}(\boldsymbol{\alpha}_0) = n^{-1} \sum_{i=1}^n R_i \tilde{\pi}^{-1}(Z_i, \mathbf{U}_i) K_h(Z_i - z) \mu_i^{(1)}(z, \boldsymbol{\alpha}_0) V_i^{-1}(z, \boldsymbol{\alpha}_0) [Y_i - \mu \{ \theta(Z_i) \}] \mathbf{G}(Z_i - z),$$

$$\mathbf{\Lambda}_{2n,\delta}(\boldsymbol{\alpha}_0) = n^{-1} \sum_{i=1}^n \{R_i \tilde{\pi}^{-1}(Z_i, \mathbf{U}_i) - 1\} K_h(Z_i - z) \mu_i^{(1)}(z, \boldsymbol{\alpha}_0) V_i^{-1}(z, \boldsymbol{\alpha}_0) \left[ \tilde{\delta}(Z_i, \mathbf{U}_i) - \mu\{\theta(Z_i)\} \right] \mathbf{G}(Z_i - z),$$

and

$$\mathbf{\Lambda}_{3n,\delta}(\boldsymbol{\alpha}_0) = n^{-1} \sum_{i=1}^n K_h(Z_i - z) \mu_i^{(1)}(z, \boldsymbol{\alpha}_0) V_i^{-1}(z, \boldsymbol{\alpha}_0) \left[ \mu\{\theta(Z_i)\} - \mu\{\mathbf{G}(Z_i - z)^T \boldsymbol{\alpha}_0\} \right] \mathbf{G}(Z_i - z).$$

One can easily see that  $\mathbf{\Lambda}_{1n,\delta}(\boldsymbol{\alpha}_0)$  and  $\mathbf{\Lambda}_{2n,\delta}(\boldsymbol{\alpha}_0)$  have mean 0 when either  $\pi$  or  $\delta$  is correctly specified. The third term  $\mathbf{\Lambda}_{3n,\delta}(\boldsymbol{\alpha}_0)$  is the leading bias term. When  $\pi_i$  or  $\delta_i$  is correctly specified, simple calculations show that  $E[\mathbf{\Lambda}_{3n,\delta}(\boldsymbol{\alpha}_0)]$  is equal to (A.3). It follows that

$$\text{bias}\{\hat{\boldsymbol{\alpha}}_{AIPW}(z)\} = \frac{1}{2} h^2 \theta''(z) c_2(K) + o(h^2).$$

Now study  $\mathbf{\Lambda}_{1n,\delta} - \mathbf{\Lambda}_{2n,\delta}$ , which contributes to the leading variance and asymptotic normality. Note that the variance of  $\mathbf{\Lambda}_{3n,\delta}(\boldsymbol{\alpha}_0)$  is of order  $o(1/nh)$ , and hence can be ignored asymptotically. Under MAR, we have  $E[R|Y, Z, \mathbf{U}] = E[R|Z, \mathbf{U}] = \pi_0(Z, \mathbf{U})$ , the true conditional mean of  $[R|Z, \mathbf{U}]$ . It follows that when either  $\pi$  or  $\delta$  is correctly specified,  $\mathbf{\Lambda}_{1n,\delta}(\boldsymbol{\alpha}_0) - \mathbf{\Lambda}_{2n,\delta}(\boldsymbol{\alpha}_0)$  is asymptotically normal with mean 0 and variance

$$\text{var}\{\mathbf{\Lambda}_{1n,\delta}(\boldsymbol{\alpha}_0) - \mathbf{\Lambda}_{2n,\delta}(\boldsymbol{\alpha}_0)\} = \frac{1}{n} [\text{var}\{\mathbf{\Lambda}_{1,2,\delta}(\boldsymbol{\alpha}_0)\}],$$

where

$$\begin{aligned} \mathbf{\Lambda}_{1,2,\delta}(\boldsymbol{\alpha}_0) &= K_h(Z - z) \mu^{(1)}(z, \boldsymbol{\alpha}_0) V^{-1}(z, \boldsymbol{\alpha}_0) \mathbf{G}(Z - z) \\ &\times \left( \frac{R}{\tilde{\pi}(Z, \mathbf{U})} [Y - \mu\{\theta(Z)\}] - \left\{ \frac{R}{\tilde{\pi}(Z, \mathbf{U})} - 1 \right\} \left[ \tilde{\delta}(Z, \mathbf{U}) - \mu\{\theta(Z)\} \right] \right) \end{aligned}$$

Further calculations show that

$$\begin{aligned} \frac{1}{n} \text{var}\{\mathbf{\Lambda}_{1,2,\delta}(\boldsymbol{\alpha}_0)\} &= \frac{1}{n} E \left[ K_h^2(Z - z) \left\{ \mu^{(1)}(z, \boldsymbol{\alpha}_0) \right\}^2 V^{-2}(z, \boldsymbol{\alpha}_0) \mathbf{G}(Z - z) \mathbf{G}(Z - z)^T \right. \\ &\times \left. \left( \frac{R}{\tilde{\pi}(Z, \mathbf{U})} [Y - \mu\{\theta(Z)\}] - \left\{ \frac{R}{\tilde{\pi}(Z, \mathbf{U})} - 1 \right\} \left[ \tilde{\delta}(Z, \mathbf{U}) - \mu\{\theta(Z)\} \right] \right)^2 \right] \\ &= \frac{1}{nh} f_Z(z) \left[ \mu^{(1)}\{\theta(z)\} \right]^2 V^{-2}\{\theta(z)\} E \left[ \left( \frac{R}{\tilde{\pi}(Z, \mathbf{U})} [Y - \mu\{\theta(Z)\}] \right. \right. \\ &\quad \left. \left. - \left\{ \frac{R}{\tilde{\pi}(Z, \mathbf{U})} - 1 \right\} \left[ \tilde{\delta}(Z, \mathbf{U}) - \mu\{\theta(Z)\} \right] \right)^2 \middle| Z = z \right] \mathbf{D}(K^2) + o\left(\frac{1}{nh}\right) \end{aligned}$$

Applying these results to (A.6) and Theorem 3 follows.
